# Supplementary material for: Mental health benefits of interactions with nature in children and teenagers: a systematic review
Source: PubMed Central journal article supplement — J Epidemiol Community Health. 2018 Jun 27;72(10):958–66. doi: 10.1136/jech-2018-210436 (PMC6161651; doi:10.1136/jech-2018-210436), 2018-06-27
Supplement: jech-2018-210436supp001.pdf [file jech-2018-210436supp001.pdf]

**Table S1** Tools used to measure mental health outcomes

| <b>Outcome</b>                                          | <b>Tool</b>                                                                                   | <b>Reference #</b> |
|---------------------------------------------------------|-----------------------------------------------------------------------------------------------|--------------------|
| Emotional Well-being                                    | Author Generated Survey: Parent Report                                                        | 43,31,47           |
|                                                         | Bar-On Emotional Quotient Inventory: Child Report                                             | 40                 |
|                                                         | Cantril Ladder: Child Report                                                                  | 33                 |
|                                                         | Kid-KINDL Questionnaire: Child Report                                                         | 38                 |
|                                                         | Life as a Whole Scale: Child Report                                                           | 49                 |
|                                                         | Hubeners Life Satisfaction Scale: Child Report                                                | 49                 |
|                                                         | Strength and Difficulties Questionnaires: Parent Report                                       | 20,21*,28,37**     |
|                                                         | Ten Domain Index of Well-being: Child Report                                                  | 49                 |
|                                                         | The Basler Well-being Questionnaire: Child Report                                             | 34                 |
|                                                         | UWIST Mood Adjective Checklist: Child Report                                                  | 41                 |
|                                                         | Youth Self-report: Child Report                                                               | 24                 |
|                                                         | Zuckerman's Inventory of Personal Reactions: Child Report                                     | 29                 |
| ADD/ADHD                                                | Author Generated Survey: Parent Report                                                        | 36,45,46           |
|                                                         | Diagnostic and Statistical Manual of Mental Disorders 4 <sup>th</sup> Edition: Teacher Report | 20                 |
|                                                         | Digit Span Backwards: Child Report                                                            | 44                 |
|                                                         | Necker Cube Pattern Control Task: Child Report                                                | 29                 |
|                                                         | Opposite Worlds Test: Child Report                                                            | 47                 |
|                                                         | Strength and Difficulties Questionnaires: Parent Report                                       | 20,21*,28, 37**    |
| Mental Health                                           | General Well-being: Child Report                                                              | 23                 |
|                                                         | Author Generated Survey: Parent Report                                                        | 31, 39             |
|                                                         | Mindful Attention and Awareness Scale: Child Report                                           | 39                 |
|                                                         | World Health Organization Well-Being Index: Child Report                                      | 48                 |
|                                                         | Life Attitudes Schedule Short Form: Child Report                                              | 24                 |
|                                                         | Millon Adolescent Clinical Inventory: Child Report                                            | 26                 |
|                                                         | Mental Component Score from the SF-12v2: Child Report                                         | 7                  |
| Strength and Difficulties Questionnaires: Parent Report | 20, 21*                                                                                       |                    |
| Self-esteem                                             | Author Generated Survey: Child Report                                                         | 7                  |
|                                                         | Coopersmith Self-Esteem Inventory: Child Report                                               | 24                 |
|                                                         | Kid-KINDL Questionnaire: Child Report                                                         | 38                 |
|                                                         | Rosenberg Self Esteem Scale: Child Report                                                     | 6, 22, 32, 52      |
|                                                         | Self-Esteem Questionnaire Piers and Harris: Child report                                      | 42                 |
|                                                         | The Behaviour Assessment System for Children: Child Report                                    | 25                 |
| Stress                                                  | Bar-On Emotional Quotient Inventory: Child Report                                             | 40                 |
|                                                         | Lewis Stressful Life Events Scale: Child Report                                               | 50                 |
|                                                         | Perceived Stress Questionnaire: Child Report                                                  | 39                 |
|                                                         | Perceived Stress Scale: Child Report                                                          | 27                 |

|            |                                                                                         |    |
|------------|-----------------------------------------------------------------------------------------|----|
| Depression | Beck Depression Inventory-II: Child Report                                              | 24 |
|            | Reynolds Depression Scale-Short Form: Child Report                                      | 48 |
|            | The Centre for Epidemiologic Studies-Depression Scale: Child Report                     | 30 |
| Resilience | 14-item Resilience Scale (RS-14): Child Report                                          | 7  |
|            | Resiliency Scale for Children and Adolescents: Child Report                             | 51 |
|            | The Resilience Questionnaire: Child Report                                              | 24 |
| HRQOL      | Kid-KINDL Questionnaire: Child Report                                                   | 38 |
|            | Pediatric Quality of Life Inventory 4.0 Generic Core Scale: Child Report & Parent Proxy | 35 |

\*Lithuanian Version of SDQ \*\*German Version of SDQ
