# Supplementary material for: Mental health benefits of interactions with nature in children and teenagers: a systematic review
Source: PubMed Central journal article supplement — J Epidemiol Community Health. 2018 Jun 27;72(10):958–66. doi: 10.1136/jech-2018-210436 (PMC6161651; doi:10.1136/jech-2018-210436), 2018-06-27
Supplement: jech-2018-210436supp002.pdf [file jech-2018-210436supp002.pdf]

**Table S2** Findings sorted by outcome and study quality of papers considering nature and mental health of children and teenagers

| Reference                                                                    | Results                                                                                                                                                                                                                                                                                                                                                                                                                                                                                                                                                                                                             |
|------------------------------------------------------------------------------|---------------------------------------------------------------------------------------------------------------------------------------------------------------------------------------------------------------------------------------------------------------------------------------------------------------------------------------------------------------------------------------------------------------------------------------------------------------------------------------------------------------------------------------------------------------------------------------------------------------------|
| <i>Outcome: Emotional Well-being    Quality: Good    Findings: 5PR 5 NS</i>  |                                                                                                                                                                                                                                                                                                                                                                                                                                                                                                                                                                                                                     |
| Amoly <i>et al.</i><br>2014 <sup>(20)</sup>                                  | PR**: More time spent playing in green spaces was associated with lower emotional symptom scores in children ages 7-10<br>PR**: Higher residential surrounding greenness at the 500m buffer was associated with lower emotional symptom scores in children ages 7-10<br>NS: No significant effect of residential proximity to major green spaces on emotional symptoms in children ages 7-10<br>NS: No significant effect of residential proximity to blue spaces on emotional symptoms in children ages 7-10<br>NS: No significant effect of time spent in blue spaces on emotional symptoms in children ages 7-10 |
| McCracken <i>et al.</i><br>2016 <sup>(38)</sup>                              | NS: No significant effect of green space use and emotional well-being subscale scores in children ages 8-11<br>NS: No significant effect of quantity of residential green space and emotional well-being subscale scores in children ages 8-11                                                                                                                                                                                                                                                                                                                                                                      |
| Opper <i>et al.</i><br>2014 <sup>(40)</sup>                                  | PR**: Following the 23 day OAEP there was a significant effect on mood in grade ten males<br>PR**: 3 months following the 23 day OAEP there was a significant effect on mood in grade ten males                                                                                                                                                                                                                                                                                                                                                                                                                     |
| Ward <i>et al.</i><br>2016 <sup>(49)</sup>                                   | PR**: Time spent in green space was positively associated with all measures of emotional well-being in children ages 11-14; even when controlled for moderate-to-vigorous physical activity                                                                                                                                                                                                                                                                                                                                                                                                                         |
| <i>Outcome: Emotional Well-being    Quality: Fair    Findings: 4 PR 8 NS</i> |                                                                                                                                                                                                                                                                                                                                                                                                                                                                                                                                                                                                                     |
| Balseviciene <i>et al.</i><br>2014 <sup>(21)</sup>                           | NS: No significant effect of proximity to city parks on emotional health in children ages 4-6<br>NS: No significant effect of residential greenness on emotional health in children ages 4-6                                                                                                                                                                                                                                                                                                                                                                                                                        |
| Bowen <i>et al.</i><br>2016 <sup>(24)</sup>                                  | NS: No significant effect from pre-post after the 10 week WAT on emotional functioning in clinical and non-clinical children ages 12-18<br>NS: No significant effect after a 3 month follow up from the 10 week WAT on emotional functioning in clinical and non-clinical children ages 12-18                                                                                                                                                                                                                                                                                                                       |
| Flouri <i>et al.</i><br>2014 <sup>(28)</sup>                                 | PR**: Poor children with more neighbourhood green space had fewer emotional problems from age 3 to 5, relative to counterparts in less green neighbourhoods.                                                                                                                                                                                                                                                                                                                                                                                                                                                        |
| Harper <i>et al.</i><br>2007 <sup>(31)</sup>                                 | PR***: 2 months following the 21 day WT there was a significant improvement in emotional problems in children ages 13-18                                                                                                                                                                                                                                                                                                                                                                                                                                                                                            |
| Huynh <i>et al.</i><br>2013 <sup>(33)</sup>                                  | NS: No significant effect of school surrounding natural space on emotional well-being in children ages 11-16<br>NS: No significant effect of school surrounding green space on emotional well-being in children ages 11-16<br>PR**: School surrounding blue space had a positive effect on emotional well-being in children ages 11-16                                                                                                                                                                                                                                                                              |

|                                                        |                                                                                                                                                                                                                                                           |
|--------------------------------------------------------|-----------------------------------------------------------------------------------------------------------------------------------------------------------------------------------------------------------------------------------------------------------|
| Kelz <i>et al.</i><br>2015 <sup>(34)</sup>             | PR***: Greening of the schoolyard saw a significant increase in intra-psychic balance compared to both control schools in children ages 13-15<br>NS: No significant effect of the greening of the schoolyard on overall well-being in children ages 13-15 |
| Markevych <i>et al.</i><br>2014 <sup>(37)</sup>        | NS: No significant effect of distance between urban green space and home with emotional symptoms in children ages 9-11                                                                                                                                    |
| Roe & Aspinall<br>2011 <sup>(41)</sup>                 | PR**: There was a significant effect in all four emotional variables, with a greater change in the forest school setting, especially for the poor behaviour group, in children age 11                                                                     |
| van den Berg &<br>van den Berg<br>2011 <sup>(47)</sup> | NS: No significant effect of natural wooded setting on mood in children with ADHD ages 9-17                                                                                                                                                               |

---

**Outcome:** Emotional Well-being    **Quality:** Poor    **Findings:** 2 PR 1 NS

---

|                                                    |                                                                                                                                                                                                                                                            |
|----------------------------------------------------|------------------------------------------------------------------------------------------------------------------------------------------------------------------------------------------------------------------------------------------------------------|
| Greenwood &<br>Gatersleben<br>2016 <sup>(29)</sup> | PR***: Increase in positive affect after time spent in outdoor environment, reduction in positive affect after time spent in indoor environment in children ages 16-18<br>NS: No significant effect of environment on attentiveness in children ages 16-18 |
| Soderstrom <i>et al.</i><br>2013 <sup>(43)</sup>   | PR***: Exposure to high-quality outdoor environment associated with better well-being in preschool children ages 3.0-5.9                                                                                                                                   |

---

**Outcome:** ADD/ADHD, Hyperactivity, Inattention    **Quality:** Good    **Findings:** 3 PR 5 NS

---

|                                                        |                                                                                                                                                                                                                                                                                                                                                                                                                                                                                                                                                                                                                                                                                                                                                                                              |
|--------------------------------------------------------|----------------------------------------------------------------------------------------------------------------------------------------------------------------------------------------------------------------------------------------------------------------------------------------------------------------------------------------------------------------------------------------------------------------------------------------------------------------------------------------------------------------------------------------------------------------------------------------------------------------------------------------------------------------------------------------------------------------------------------------------------------------------------------------------|
| Amoly <i>et al.</i><br>2014 <sup>(20)</sup>            | NS: No significant effect of green space playing time on ADHD and hyperactivity/inattention in children ages 7-10<br>PR**: Higher residential surrounding greenness at the 100m buffer was associated with lower ADHD and inattention symptom scores in children ages 7-10<br>PR**: Higher residential surrounding greenness at all buffers was associated with lower hyperactivity/inattention scores in children ages 7-10<br>NS: No significant effect of residential proximity to major green space on ADHD and hyperactivity/inattention in children ages 7-10<br>NS: No significant effect of residential proximity to blue spaces on ADHD symptom scores in children ages 7-10<br>NS: No significant effect of time spent in blue spaces on ADHD symptom scores in children ages 7-10 |
| Taylor & Kuo<br>2009 <sup>(44)</sup>                   | PR**: The park setting saw a significant positive effect on concentration compared to the other two settings in children ages 7-12                                                                                                                                                                                                                                                                                                                                                                                                                                                                                                                                                                                                                                                           |
| van den Berg &<br>van den Berg<br>2011 <sup>(47)</sup> | NS: No significant effect of natural wooded setting on concentration in children ages 9-17                                                                                                                                                                                                                                                                                                                                                                                                                                                                                                                                                                                                                                                                                                   |

---

---

**Outcome: ADD/ADHD, Hyperactivity, Inattention    Quality: Fair    Findings: 4 PR 1 NS**

---

- Balseviciene *et al.* 2014<sup>(21)</sup> PR\*\*: Increase in distance to city parks was associated with increased hyperactivity in children ages 4-6, lower maternal education group  
NS: No significant effect between residential greenness and hyperactivity in children ages 4-6, higher maternal education group
- Flouri *et al.* 2014<sup>(28)</sup> PR\*\*: Access to gardens was related to fewer hyperactivity problems in children at ages 3, 5, and 7  
PR\*\*: Use of parks and playgrounds was related to fewer hyperactivity problems in children at ages 3, 5, and 7
- Markevych *et al.* 2014<sup>(37)</sup> PR\*\*: The further the distance to the nearest green space from home was associated with a higher risk of hyperactivity and inattention problems in males ages 9-11

---

**Outcome: ADD/ADHD, Hyperactivity, Inattention    Quality: Poor    Findings: 6 PR 0 NS**

---

- Greenwood & Gatersleben 2016<sup>(29)</sup> PR\*\*\*: Attention scores were reduced significantly more after the 20 minutes spent in the outdoor environment than in the indoor environment in children ages 16-18
- Kuo & Taylor 2004<sup>(36)</sup> PR\*\*\*: Green outdoor activities after school and on weekends were significantly more helpful in reducing symptoms than built outdoor or indoor activities for children ages 5-18. This held for children with and without hyperactivity as well as when activity type was controlled for
- Taylor & Kuo 2011<sup>(45)</sup> PR\*\*\*: Play in both outdoor green settings was associated with less severe ADD symptoms compared to the indoor or built outdoor settings, in children ages 5-18  
PR\*\*\*: One of the outdoor green settings, open grass, had the most significant effect on ADHD symptom severity in children ages 5-18
- Taylor *et al.* 2001<sup>(46)</sup> PR\*\*\*: Participation in activities in green outdoor settings were associated with better functioning in children ages 7-12  
PR\*\*\*: The more green the play setting the less severe the attention deficit symptoms in children ages 7-12

---

**Outcome: Overall Mental Health    Quality: Good    Findings: 4 PR 1 NS**

---

- Amoly *et al.* 2014<sup>(20)</sup> PR\*\*: Statistically significant decrease in total SDQ scores and green space playing time in children ages 7-10  
PR\*\*: Statistically significant decrease in total SDQ scores and residential surrounding greenness at all buffers in children ages 7-10  
PR\*\*: Statistically significant decrease in total SDQ scores and annual beach attendance in children ages 7-10
- Clark *et al.* 2004<sup>(26)</sup> PR\*\*\*: Significant effect on clinical syndromes scales after the 21 day WTP in children ages 13-18
- Ritchie *et al.* 2014<sup>(7)</sup> NS: No significant effect on mental health scores from pre to post intervention to 1 year follow up of the 10 week OAP in children ages 12-18
-

| <i>Outcome: Overall Mental Health    Quality: Fair    Findings: 4 PR 2 NS 1 NR</i> |                                                                                                                                                                                                                                                                                                                                                                                                                                                                                                                                                                                                                                    |
|------------------------------------------------------------------------------------|------------------------------------------------------------------------------------------------------------------------------------------------------------------------------------------------------------------------------------------------------------------------------------------------------------------------------------------------------------------------------------------------------------------------------------------------------------------------------------------------------------------------------------------------------------------------------------------------------------------------------------|
| Balseviciene <i>et al.</i><br>2014 <sup>(21)</sup>                                 | PR**: Living further from city parks was associated with worse mental health in children ages 4-6, whose mothers had a lower education<br>NR*: More residential greenness was associated with worse mental health in children ages 4-6, whose mothers had a higher education                                                                                                                                                                                                                                                                                                                                                       |
| Bowen <i>et al.</i><br>2016 <sup>(24)</sup>                                        | NS: No significant effect from pre-post 10 week WAT on suicidality in children ages 12-18<br>PR*: After the 10-week WAT there was a statistically significant reduction at 3 month follow up in suicidality in children ages 12-18                                                                                                                                                                                                                                                                                                                                                                                                 |
| van Lier <i>et al.</i><br>2017 <sup>(48)</sup>                                     | PR**: Participating in gardening at home was significantly associated with better mental well-being in children ages 12-18                                                                                                                                                                                                                                                                                                                                                                                                                                                                                                         |
| Harper <i>et al.</i><br>2007 <sup>(31)</sup>                                       | PR***: 12 months following the 21 day WT there was a significant improvement on suicidal thoughts/ideation in children ages 13-18<br>NS: No significant effect 2 months following the 21 day WT on other components of mental health in children ages 13-18                                                                                                                                                                                                                                                                                                                                                                        |
| <i>Outcome: Overall Mental Health    Quality: Poor    Findings: 3 PR 3 NS</i>      |                                                                                                                                                                                                                                                                                                                                                                                                                                                                                                                                                                                                                                    |
| Mutz & Muller<br>2016 <sup>(39)</sup>                                              | PR**: Significant increase in mindfulness from T1 to T2 after a 9 day hike in children age 14<br>PR**: Significant increase in mean life satisfaction from T1 to T2 after a 9 day hike in children age 14<br>NS: No significant effect from the 9 day hike on happiness in children age 14                                                                                                                                                                                                                                                                                                                                         |
| Bowen & Neill<br>2016 <sup>(23)</sup>                                              | PR**: Significant improvement in one measure of mental health (psychological well-being) at the 6-12 month follow up after 15 programming days during a 10-12 week outdoor adventure intervention program in children ages 13-16<br>NS: No significant effect on overall mental health or psychological distress at the 6-12 month follow up after 15 programming days during a 10-12 week outdoor adventure intervention program in children ages 13-16<br>NS: No significant effect on all measures of mental health after 15 programming days during a 10-12 week outdoor adventure intervention program in children ages 13-16 |
| <i>Outcome: Self-esteem    Quality: Good    Findings: 1 PR 2 NS</i>                |                                                                                                                                                                                                                                                                                                                                                                                                                                                                                                                                                                                                                                    |
| McCracken <i>et al.</i><br>2016 <sup>(38)</sup>                                    | PR**: Increased green space use was positively associated with the self-esteem subscale scores in children ages 8-11<br>NS: No significant effect of quantity of residential green space and self-esteem subscale scores in children ages 8-11                                                                                                                                                                                                                                                                                                                                                                                     |
| Ritchie <i>et al.</i><br>2014 <sup>(7)</sup>                                       | NS: No significant effect on self-esteem scores from pre to post intervention to 1 year follow up of the 10 week OAP in children ages 12-18                                                                                                                                                                                                                                                                                                                                                                                                                                                                                        |
| <i>Outcome: Self-esteem    Quality: Fair    Findings: 2 PR 8 NS</i>                |                                                                                                                                                                                                                                                                                                                                                                                                                                                                                                                                                                                                                                    |
| Barton <i>et al.</i><br>2015 <sup>(22)</sup>                                       | NS: No significant effect from a nature based playtime intervention on self-esteem in children ages 8-9                                                                                                                                                                                                                                                                                                                                                                                                                                                                                                                            |

Bowen *et al.* 2016<sup>(24)</sup> PR\*: After the 10-week WAT there was a statistically significant improvement from pre to post in 1/4 subscales of self-esteem (social) in children ages 12-18  
 PR\*: After the 10-week WAT there was a statistically significant improvement at the 3 month follow up in 1/4 subscales of self-esteem (general) in children ages 12-18

Cammack *et al.* 2002<sup>(25)</sup> NS: No significant effect after the 10 week WAT on self-esteem overall in children ages 12-18  
 NS: No significant effect of the 16 week program (64 hours) on self-esteem in children potentially ages 12-18

Hinds 2011<sup>(32)</sup> NS: No significant effect of the two to five night WEP on self-esteem in children ages 12-15

Reed *et al.* 2013<sup>(6)</sup> NS: No significant effect of the green setting on self-esteem in children 11-12

Romi & Kohan 2004<sup>(42)</sup> NS: No significant effect from the WTP on self esteem in children ages 15-18  
 NS: No significant difference was found between the groups before and after the WTP in children ages 15-18

Wood *et al.* 2014<sup>(52)</sup> NS: No significant effect for the change in self-esteem due to the environment, both natural and built in children ages 8-9

---

*Outcome: Stress    Quality: Good    Findings: 1 PR 1 NS*

---

Opper *et al.* 2014<sup>(40)</sup> PR\*\*: Following the 23 day OAEP there was a significant effect on stress in grade ten males  
 NS: 3 months following the 23 day OAEP there was no significant effect on stress in grade ten males

---

*Outcome: Stress    Quality: Fair    Findings: 3 PR 0 NS*

---

Feda *et al.* 2015<sup>(27)</sup> PR\*\*: Percentage of park area within a 800m buffer of home predicted perceived stress among children ages 12-15, when controlled for SES and physical activity

Wells & Evans 2003<sup>(50)</sup> PR\*\*: More nature near the home was associated with significantly less psychological distress in children grades 3-5  
 PR\*\*\*: Nearby nature was found to buffer the effects of stressful life events on children's psychological distress in children grades 3-5

---

*Outcome: Stress    Quality: Poor    Findings: 1 PR 1 NS*

---

Mutz & Muller 2016<sup>(39)</sup> NS: No significant effect from the 9 day hike on the stress subscale of worries in children ages 14  
 PR\*\*: There was a significant decrease in the stress subscale of demand from T1 to T2 after a 9 day hike in children age 14

---

| <i>Outcome: Depression    Quality: Fair    Findings: 2 PR 4 NS</i> |                                                                                                                                                                                                                                                                                                                                                                                                                                                                                                                |
|--------------------------------------------------------------------|----------------------------------------------------------------------------------------------------------------------------------------------------------------------------------------------------------------------------------------------------------------------------------------------------------------------------------------------------------------------------------------------------------------------------------------------------------------------------------------------------------------|
| Bowen <i>et al.</i><br>2016 <sup>(24)</sup>                        | PR*: After the 10-week WAT there was a statistically significant improvement from pre to post in clinically depressed children ages 12-18<br>NS: No significant effect at the 3 month follow up from the 10 week WAT on clinically depressed children ages 12-18<br>NS: No significant effect from pre to post from the 10 week WAT on non-clinically depressed children ages 12-18<br>NS: No significant effect at the 3 month follow up from the 10 week WAT on non-clinically depressed children ages 12-18 |
| Gubbels <i>et al.</i><br>2016 <sup>(30)</sup>                      | NS: No significant effect of changes of perceived greenery on depressive symptoms on children ages 12-15                                                                                                                                                                                                                                                                                                                                                                                                       |
| van Lier <i>et al.</i><br>2017 <sup>(48)</sup>                     | PR**: Participating in gardening at home was significantly associated with lower levels of depressive symptoms in children ages 12-18                                                                                                                                                                                                                                                                                                                                                                          |
| <i>Outcome: Resilience    Quality: Good    Findings: 2 PR 2 NS</i> |                                                                                                                                                                                                                                                                                                                                                                                                                                                                                                                |
| Ritchie <i>et al.</i><br>2014 <sup>(7)</sup>                       | PR**: At the 1 month follow up there was a significant increase in resilience scores after the 10 day OAP in children ages 12-18<br>NS: At the 1 year follow up resilience scores returned to pre intervention levels in children ages 12-18                                                                                                                                                                                                                                                                   |
| Whittington <i>et al.</i><br>2016 <sup>(51)</sup>                  | PR**: Pre to post participation in the OAP was associated with a significant increase in resiliency and decrease in emotional reactivity in girls ages 10-15<br>NS: 1 month following participation in the OAP was not associated with significant improvements in resilience in girls ages 10-15                                                                                                                                                                                                              |
| <i>Outcome: Resilience    Quality: Fair    Findings: 1 PR 0 NS</i> |                                                                                                                                                                                                                                                                                                                                                                                                                                                                                                                |
| Bowen <i>et al.</i><br>2016 <sup>(24)</sup>                        | PR*: After the 10-week WAT there was a statistically significant improvement from pre-post in resilience in children ages 12-18                                                                                                                                                                                                                                                                                                                                                                                |
| <i>Outcome: HRQOL    Quality: Good    Findings: 1 PR 1 NS</i>      |                                                                                                                                                                                                                                                                                                                                                                                                                                                                                                                |
| McCracken <i>et al.</i><br>2016 <sup>(38)</sup>                    | PR**: More time spent in green space was associated with a better HRQOL in children ages 8-11<br>NS: No significant effect of quantity of residential green space and HRQOL in children ages 8-11                                                                                                                                                                                                                                                                                                              |
| <i>Outcome: HRQOL    Quality: Fair    Findings: 3 PR 0 NS</i>      |                                                                                                                                                                                                                                                                                                                                                                                                                                                                                                                |
| Kim <i>et al.</i><br>2016 <sup>(35)</sup>                          | PR: Greater accessibility to parks*** and open spaces** around the home was associated with the likelihood of having a higher HRQOL in children ages 9-11<br>PR**: Larger and more tree areas in the neighbourhood was associated with the likelihood of having a higher HRQOL in children ages 9-11<br>PR***: Further distance between tree patches was associated with a higher HRQOL in children ages 9-11                                                                                                  |

Notes: PR = nature has significant positive benefit on outcome; NR = nature has significant negative impact on outcome; NS = non-significant finding; \*\*\*CI: 99%; \*\*CI: 95%; \*CI: 90%
